# Supplementary material
Source: PubMed Central journal article supplement (PMC8952193)
Supplement: NIHMS1787584-supplement-Supplement.pdf [file NIHMS1787584-supplement-Supplement.pdf]

## Deep-learning based image reconstruction for MRI-guided near-infrared spectral tomography: supplement

JINCHAO FENG,<sup>1,2,3</sup> WANLONG ZHANG,<sup>1,2</sup> ZHE LI,<sup>1,2,5</sup>  KEBIN JIA,<sup>1,2</sup> SHUDONG JIANG,<sup>3,6</sup>  HAMID DEGHANI,<sup>4</sup>  BRIAN W. POGUE,<sup>3</sup>  AND KEITH D. PAULSEN<sup>3,7</sup>

<sup>1</sup>Beijing Key Laboratory of Computational Intelligence and Intelligent System, Faculty of Information Technology, Beijing University of Technology, Beijing 100124, China

<sup>2</sup>Beijing Laboratory of Advanced Information Networks, Beijing 100124, China

<sup>3</sup>Thayer School of Engineering, Dartmouth College, Hanover, New Hampshire 03755, USA

<sup>4</sup>School of Computer Science, University of Birmingham, Birmingham, B15 2TT, UK

<sup>5</sup>e-mail: lizhe1023@bjut.edu.cn

<sup>6</sup>e-mail: shudong.jiang@dartmouth.edu

<sup>7</sup>e-mail: keith.d.paulsen@dartmouth.edu

---

This supplement published with Optica Publishing Group on 24 February 2022 by The Authors under the terms of the [Creative Commons Attribution 4.0 License](https://creativecommons.org/licenses/by/4.0/) in the format provided by the authors and unedited. Further distribution of this work must maintain attribution to the author(s) and the published article's title, journal citation, and DOI.

Supplement DOI: <https://doi.org/10.6084/m9.figshare.18662870>

Parent Article DOI: <https://doi.org/10.1364/OPTICA.446576>

# Deep Learning based Reconstruction of MRI Guided Near Infrared Spectral Tomography Avoids the Limitations of Forward Diffuse Modeling: supplemental document

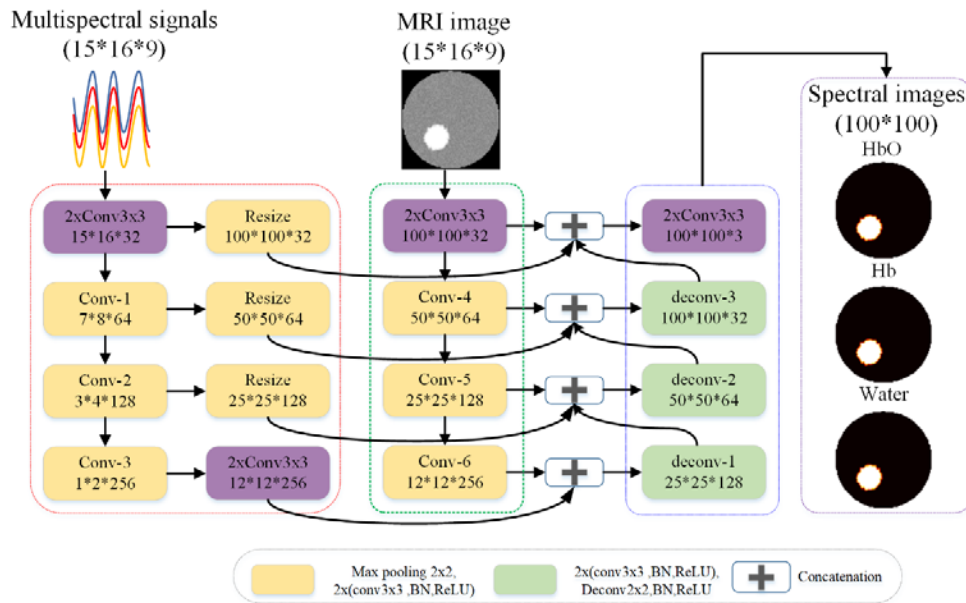

Fig. S1. Architecture of the Y-Net used in this study. All operations are accompanied by a batch-normalization (BN) and ReLU.

Table S1. Chromophore properties used for generating datasets.

| Chromophore           | Background | Inclusion | Contrast |
|-----------------------|------------|-----------|----------|
| HbO [ $\mu\text{M}$ ] | 15         | 18        | 1.20     |
|                       | 16         | 24        | 1.50     |
|                       | 17.5       | 28        | 1.60     |
| Hb [ $\mu\text{M}$ ]  | 7.5        | 9         | 1.20     |
|                       | 8          | 10        | 1.25     |
|                       | 8.5        | 13.6      | 1.6      |
| Water [%]             | 30%        | 45%       | 1.50     |
|                       | 50%        | 85%       | 1.70     |
|                       | 40%        | 80%       | 2.00     |

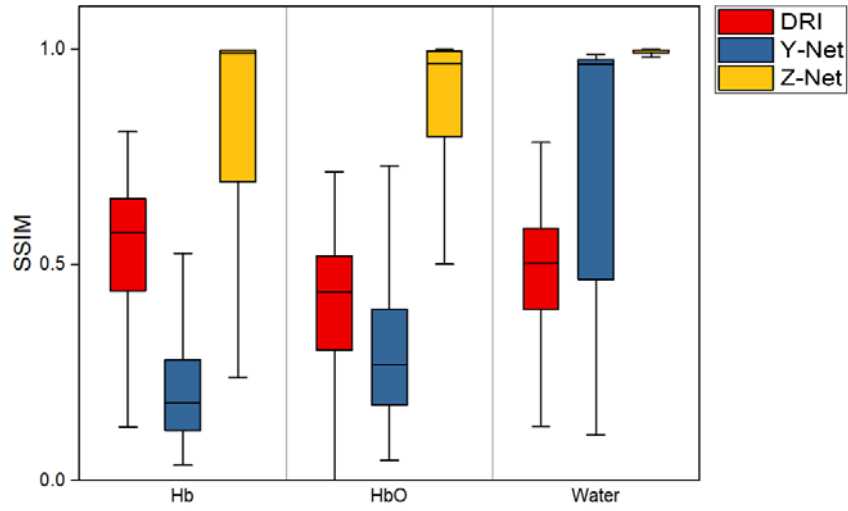

Fig. S2. Statistical results for three algorithms for SSIM.

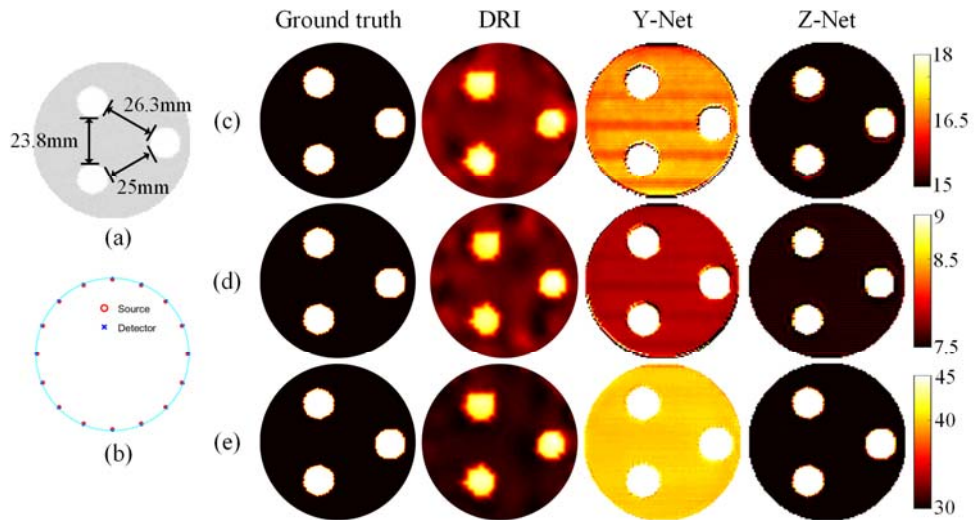

Fig. S3. Reconstructed images of HbO, Hb, and water in the case of three inclusions. (a) MRI images, (b) source/detector positions around the phantom, (c)-(e) true and reconstructed images of HbO, Hb, and water, respectively.

Table S2. Quantitative results for different methods in the case of three inclusions.

| Evaluation metric | Algorithm | HbO  | Hb   | Water |
|-------------------|-----------|------|------|-------|
| MSE               | DRI       | 0.27 | 0.07 | 6.7   |
|                   | Y-Net     | 2.57 | 0.12 | 9.33  |
|                   | Z-Net     | 0.02 | 0.01 | 0.02  |
| PSNR (dB)         | DRI       | 12.6 | 11.7 | 13.8  |
|                   | Y-Net     | 13.5 | 20.5 | 18.3  |
|                   | Z-Net     | 39.3 | 36.1 | 44.8  |
| SSIM              | DRI       | 0.49 | 0.62 | 0.62  |
|                   | Y-Net     | 0.14 | 0.67 | 0.52  |
|                   | Z-Net     | 0.95 | 0.96 | 0.96  |

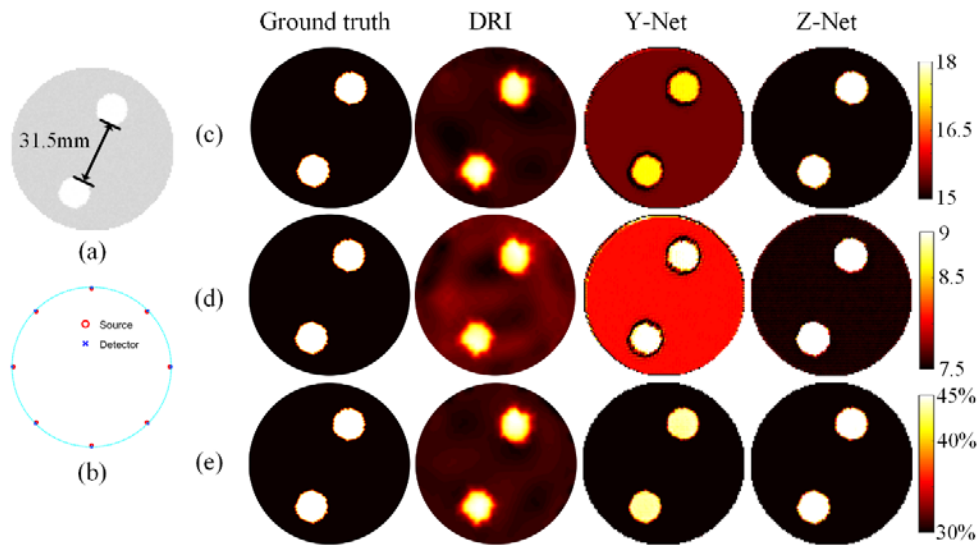

Fig. S4. Reconstructed images with 8 source-detector pairs. (a) MRI image, (b) source/detector positions around the phantom, (c)-(e) are reconstructed images of HbO, Hb, and water, respectively.

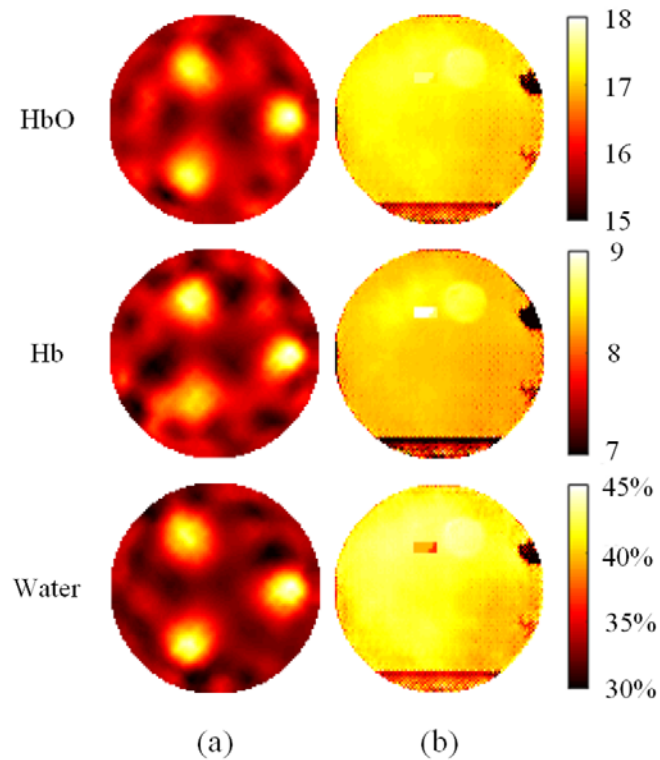

Fig. S5. Reconstructed images without MRI guidance in the case of three phantom inclusions. (a) Images recovered with a traditional reconstruction algorithm [20]; (b) Images reconstructed with the Z-Net architecture but without MRI guidance.
